# Supplementary material
Source: PubMed Central journal article supplement (PMC4332699)
Supplement: NIHMS655249-supplement-supplement_1.pdf [file NIHMS655249-supplement-supplement_1.pdf]

**Supplemental Table. Characteristics of patient in PIV-3 antibody cohort and other patients who received allogeneic transplants during the study period, 1992-2009**

|                                                  | <b>Patients with Ab titers (n=172)</b> | <b>Patients without Ab titers (n=178)</b> | <b>p value</b> |
|--------------------------------------------------|----------------------------------------|-------------------------------------------|----------------|
| <b>Sex</b>                                       |                                        |                                           | 0.52           |
| Male                                             | 111 (65)                               | 109 (61)                                  |                |
| Female                                           | 61 (35)                                | 69 (39)                                   |                |
| <b>Age at HCT<sup>a</sup></b>                    | 41 (1-72)                              | 37 (0.4-73)                               | 0.01           |
| <b>Disease risk at HCT</b>                       |                                        |                                           | 0.14           |
| Standard                                         | 101 (59)                               | 118 (66)                                  |                |
| High                                             | 71 (41)                                | 60 (34)                                   |                |
| <b>Transplant year</b>                           |                                        |                                           | 0.42           |
| 1992-2000                                        | 99 (58)                                | 110 (62)                                  |                |
| 2001-2009                                        | 73 (42)                                | 68 (38)                                   |                |
| <b>Stem cell source</b>                          |                                        |                                           | 0.20           |
| Bone marrow                                      | 97 (56)                                | 107 (60)                                  |                |
| Peripheral blood stem cell                       | 72 (42)                                | 63 (35)                                   |                |
| Cord blood                                       | 3 (2)                                  | 8 (4)                                     |                |
| <b>Donor type</b>                                |                                        |                                           | 0.001          |
| Related                                          | 104 (60)                               | 77 (43)                                   |                |
| Unrelated                                        | 68 (40)                                | 101 (57)                                  |                |
| <b>Conditioning regimen</b>                      |                                        |                                           | 0.61           |
| MA including high-dose TBI ( $\geq 12$ Gy)       | 75 (44)                                | 87 (49)                                   |                |
| MA $\pm$ low-dose TBI ( $\leq 2$ Gy)             | 63 (37)                                | 60 (34)                                   |                |
| Reduced intensity <sup>b</sup>                   | 34 (20)                                | 31 (17)                                   |                |
| <b>GVHD prophylaxis<sup>c</sup></b>              |                                        |                                           | 0.07           |
| MTX + CNI                                        | 109 (63)                               | 133 (75)                                  |                |
| MMF + CNI                                        | 41 (24)                                | 31 (17)                                   |                |
| Other                                            | 22 (13)                                | 14 (8)                                    |                |
| <b>Days between HCT and infection</b>            |                                        |                                           | <0.001         |
| $\leq 30$                                        | 33 (19)                                | 35 (20)                                   |                |
| 31-365                                           | 135 (78)                               | 104 (58)                                  |                |
| > 365                                            | 4 (2)                                  | 39 (22)                                   |                |
| <b>Lymphocyte count at diagnosis<sup>d</sup></b> |                                        |                                           | 0.25           |
| > 500 $\times 10^6$ /L                           | 61 (35)                                | 64 (36)                                   |                |
| 100-500 $\times 10^6$ /L                         | 82 (48)                                | 86 (48)                                   |                |
| < 100 $\times 10^6$ /L                           | 26 (15)                                | 19 (11)                                   |                |
| <b>Co-pathogen<sup>e</sup></b>                   |                                        |                                           | 0.05           |
| None                                             | 148 (86)                               | 146 (82)                                  |                |
| Any pathogen                                     | 24 (14)                                | 26 (15)                                   |                |

All values are indicated as the number (percentage).

<sup>a</sup> Values are indicated as the median (range). <sup>b</sup> Reduced intensity regimens consisted mainly of fludarabine with 2 Gy TBI. <sup>c</sup> MTX + CNI group includes MTX alone (n=4), MMF + CNI includes MMF alone (n=1), other includes CNI alone and CNI+steroid. <sup>d</sup> Data missing for 3 patients in antibody cohort and 9 patients in comparator cohort. <sup>e</sup> Data missing for 6 HCT: hematopoietic cell transplantation, MA: myeloablative, TBI: total body irradiation, CNI: calcineurin inhibitor, MTX: methotrexate, MMF: mycophenolate mofetil
